# Supplementary material for: C3N/phosphorene heterostructure: a promising anode material in lithium-ion batteries
Source: Royal Society of Chemistry journal article supplement (doi:10.1039/c8ta10972a), 2018-12-31
Supplement: c8ta10972a1.pdf [file c8ta10972a1.pdf]

## C<sub>3</sub>N/phosphorene heterostructure: a promising anode material in lithium-ion batteries

Gen-Cai Guo<sup>1,2</sup>, Ru-Zhi Wang<sup>1,2\*</sup>, Bang-Ming Ming<sup>1,2</sup>, Changhao Wang<sup>1,2</sup>, Si-Wei Luo<sup>1,2</sup>, Ming Zhang<sup>1,2</sup>, Hui Yan<sup>1,2</sup>

<sup>1</sup>College of Materials Science and Engineering, Beijing University of Technology, Beijing 100124, China

<sup>2</sup>Key Laboratory of Advanced Functional Materials, Education Ministry of China, Beijing University of Technology, Beijing 100124, China

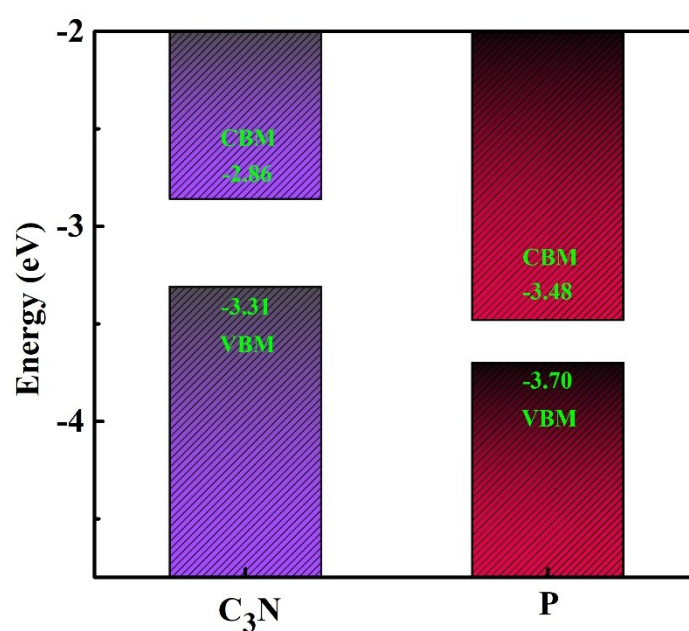

**Fig. S1.** Band alignment of stress-containing C<sub>3</sub>N and phosphorene. CBM and VBM are calculated by PBE method.

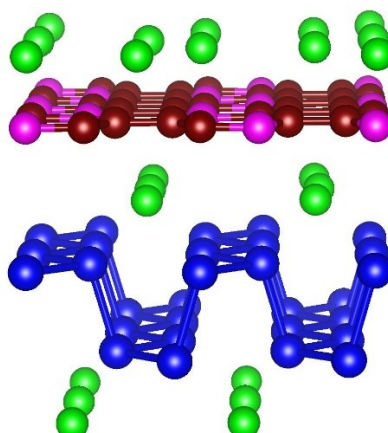

**Fig. S2** Optimized structure of Li<sub>2.5</sub>C<sub>3</sub>NP.

\*To whom correspondence should be addressed: [wrz@bjut.edu.cn](mailto:wrz@bjut.edu.cn)

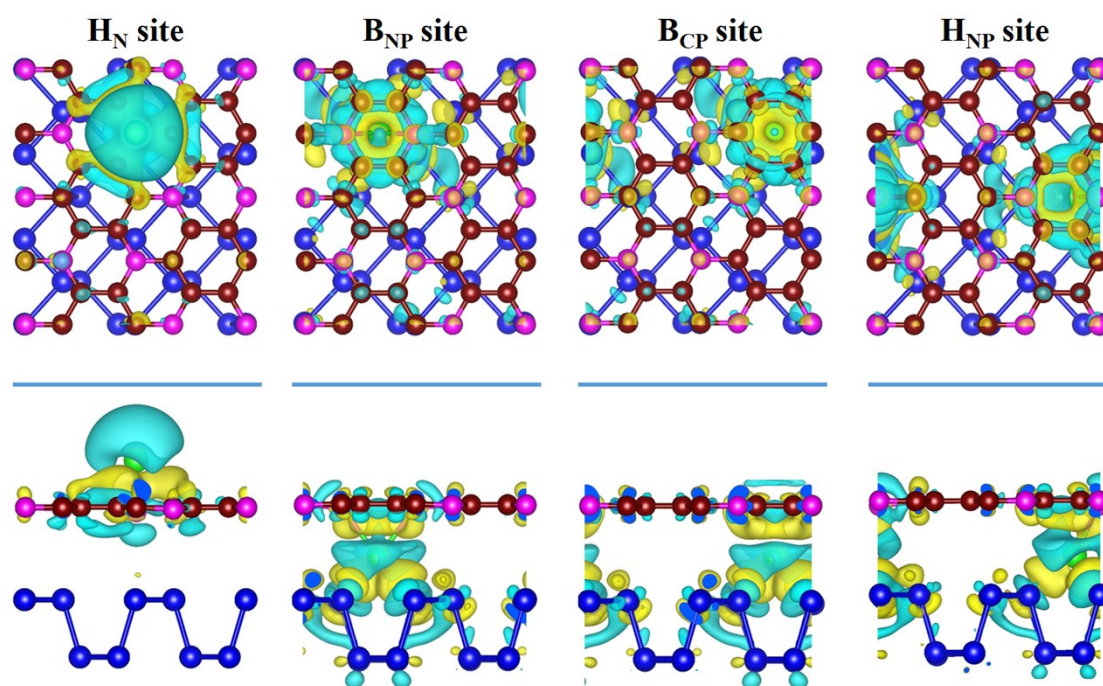

**Fig. S3** Top and side views of the diff charge density of Li inserted into (a)  $H_N$  site, (b)  $B_{NP}$  site, (c)  $B_{CP}$  site and (d)  $H_{NP}$  site. The loss of electrons is indicated in blue and gain of electrons is indicated in yellow.
